1 Running title: *Festuca ovina* USDA PI DNA ploidy estimation  
2 Title: **DNA Content and Ploidy Estimation of *Festuca ovina* Accessions by Flow Cytometry**

3 **Authors:** Yinjie Qiu\*, Sierra Hamernick, Joan Barreto Ortiz, and Eric Watkins

4 \*Corresponding Author: Yinjie Qiu, 440 Alderman Hall, Folwell Ave, St. Paul, MN 55108,  
5 USA, qiuxx221@umn.edu

6 Y. Qiu, S.H, J.O, and E. Watkins, Department of Horticultural Science, University of Minnesota,  
7 St. Paul, MN, 55108, USA

8 Abbreviations: USDA, United States Department of Agriculture; NPGS, National Plant  
9 Germplasm System;

10

11 **ABSTRACT:** *Festuca ovina* is a fine fescue that is used as a low-input turfgrass. The ploidy  
12 levels of *F. ovina* accessions held by the USDA National Plant Germplasm System (NPGS) are  
13 unknown, limiting the use of the germplasm in breeding programs. The objective of this study  
14 was to determine DNA content and estimate ploidy of these 127 accessions. Among the  
15 accessions, we identified a wide range of ploidy levels from diploid to octoploid. We also found  
16 the accessions with higher ploidy levels usually had larger seed size. These results will be  
17 informative to plant breeders and researchers using germplasm from the *F. ovina* collection and  
18 point to challenges in maintaining polyploid, outcrossing germplasm seed stocks in common  
19 nurseries.

20

## 21 INTRODUCTION

22 Fine fescues (*Festuca* spp. L.) are a diverse group of grasses characterized by fine leaf  
23 texture. Fine fescues are native to Eurasia but have been introduced and naturalized to many  
24 temperate regions in the world (Barkworth, Capels, Long, Anderton, & Piep, 2007; Beard, 1972;  
25 Vasey, 1883). These grasses are used for forage, ornamental purposes, and particularly as low-  
26 input turfgrasses. The group comprises genetically diverse taxa, including hard fescue (*Festuca*  
27 *brevipila* Tracey,  $2n=6x=42$ ), sheep fescue (*F. ovina* L.,  $2n=4x=28$ ), strong creeping red fescue  
28 (*Festuca rubra* ssp. *rubra*  $2n=8x=56$ ), slender creeping red fescue [*Festuca rubra* ssp. *litoralis*  
29 (G. Mey.) Auquier  $2n=6x=42$ ], and Chewings fescue [*Festuca rubra* ssp. *fallax* (Thuill.) Nyman  
30  $2n=6x=42$ ] ((Ruemmele, Brillman, & Huff, 1995).

31 Based on their morphology, cytology, and chloroplast-genome-based phylogenetic  
32 relationship, fine fescues are divided in two complexes: the *F. ovina* complex, which includes *F.*  
33 *brevipila* and *F. ovina*, and the *F. rubra* complex, which includes *F. rubra* ssp. *litoralis*, *F. rubra*  
34 ssp. *rubra*, and *F. rubra* ssp. *fallax* (Huff & Palazzo, 1998; Qiu, Hirsch, Yang, & Watkins, 2019;  
35 Wilkinson & Stace, 1991). Species in *F. ovina* are bunch-type and non-rhizomatous while  
36 subspecies in the *F. rubra* complex can be rhizomatous (ssp. *litoralis* and ssp. *rubra*) and bunch-  
37 type (ssp. *fallax*). Taxon identification within the *F. ovina* complex is difficult because of  
38 morphological and ecotype diversity (Piper, 1906; Schmit, Duell, & Funk, 1974). Previously,  
39 leaf color has been used for species identification; however, in the United States, sheep fescue is  
40 described as having a bluish-gray leaf color and hard fescue leaf blade color is considered green  
41 (Beard, 1972), while in Europe, it is the opposite (Hubbard, 1968). The *F. ovina* complex also  
42 includes some other taxa beyond those commonly used as turfgrasses that have ploidy level  
43 varying from diploid ( $2n=2x=14$ ) such as *Festuca ovina* ssp. *ovina*, tetraploid *Festuca*

44 *armoricana*, and hexaploid *Festuca huonii* (Seal, 1983; Stace, 2010; Wilkinson & Stace, 1991).  
45 All of these factors make the identification of *F. ovina* challenging.

46 Turfgrass breeding and genetics objectives are focused on aesthetic beauty, disease  
47 resistance, drought tolerance, and traits associated with reduced inputs (Bonos, Clarke, & Meyer,  
48 2006; Bonos & Huff, 2013; Casler, 2003; Clarke et al., 2006). Plant breeders seek desirable  
49 alleles in exotic accessions and attempt to introgress them into the existing cultivars. One of the  
50 most valuable resources for breeders is the USDA-ARS National Plant Germplasm System  
51 (NPGS), which holds more than 500,000 accessions that represent more than 10,000 plant  
52 species. These accessions have been widely used in plant breeding programs for abiotic and  
53 biotic stress improvement (Chang & Hartman, 2017; Christensen et al., 2007; Dilday, Lin, &  
54 Yan, 1994; Leng, Wang, Ali, Zhao, & Zhong, 2016; Nelson, Amdor, & Orf, 1987). To improve  
55 turfgrass cultivars by utilizing the germplasm accessions, it is important to know the ploidy level  
56 of the accessions used to avoid hybridizing plants with different ploidy levels that results in  
57 nonviable offspring. Additionally, without knowing the ploidy level, genetics and phenotyping of  
58 these germplasm could lead to incorrect interpretation of results.

59 Traditional plant breeding methods that emphasize hybridizing elite germplasm usually  
60 result in the loss of genetic diversity and heterosis which could result in greater susceptibility to  
61 important stresses (Christiansen, Andersen, & Ortiz, 2002; Melchinger, 1999; Reif et al., 2005).  
62 The use of exotic germplasm has been a common practice in maintaining plant genetic diversity  
63 in the breeding process to reduce these problems and avoid breeding bottlenecks (Goodman,  
64 1999; Mikel, Diers, Nelson, & Smith, 2010; Prasanna, 2012; Van Esbroeck & Bowman, 1998).  
65 In both cool-season and warm-season turfgrasses, genetic diversity of available germplasm has

66 been studied using either molecular markers or sequencing arrays (Baird et al., 2012; Budak,  
67 Shearman, Gaussoin, & Dweikat, 2004; Chen, Wang, Waltz, & Raymer, 2009).

68 For NPGS accessions from the *F. ovina* complex, it is necessary to determine ploidy level  
69 before conducting germplasm selection and performing hybridization; this has traditionally been  
70 done by counting chromosomes (Maluszynska, 2003; Vargas, McAllister, Morton, Jury, &  
71 Wilkinson, 1999), a reliable but time-consuming method which is made all the more challenging  
72 when dealing with the numerous and small (even under magnification) chromosomes of the fine  
73 fescue species. Flow cytometry is a powerful tool for DNA content measurement and allows  
74 researchers to estimate the ploidy level by comparing to known standards. This method is less  
75 time consuming, cheaper, and proven to work in grasses where it has been used to calculate the  
76 DNA content and estimate ploidy levels in Texas bluegrass (*Poa arachnifera* Torr.), buffalograss  
77 [*Bouteloua dactyloides* (Nutt.) Engelm.], perennial ryegrass (*Lolium perenne* L.) and fine  
78 fescues (Ka Arumuganathan & Earle, 1991; Goldman, 2015; Huff & Palazzo, 1998; Johnson,  
79 Kenworthy, Auld, & Riordan, 2001; Johnson, Riordan, & Arumuganathan, 1998; Qiu et al.,  
80 2019).

81 We used flow cytometry to determine the DNA content and ploidy level of 127 USDA *F.*  
82 *ovina* PI collections. In addition, we used image analysis to measure and compare the seed size  
83 on selected PI accessions among ploidy levels.

84

## 85 MATERIAL AND METHODS

### 86 Plant Material

87 A total of 127 accessions labeled as *Festuca ovina* from 20 countries were obtained from  
88 the USDA Germplasm Resources Information Network (GRIN) in 2016 (**Table S1**).

89 Seeds of each accession were sown into greenhouse pots (four-inch size) filled with BRK  
90 Promix soil (Premier Tech, USA) at the Plant Growth Facility at the University of Minnesota in  
91 St. Paul. After reaching four to five leaf stage, five seedlings per accession were randomly  
92 selected and transplanted into individual one-inch size cone container. Plants were grown with  
93 16 h day and 8 hr night with bi-daily watering and weekly fertilization using Peat-lite 20-10-20  
94 fertilizer (J.R. Peters Inc.) with supplemental ammonium sulfate and Sprint 330 (BASF, USA).  
95 The five genotypes of each accession were vegetatively cloned into six replications of each  
96 genotype and transplanted to a field nursery in at the Minnesota Agricultural Experiment Station  
97 in St. Paul, MN. *F. ovina* cv. Quatro and *F. brevipila* cv. Beacon were also planted in the field as  
98 standards.

### 99 Flow Cytometry Procedure

100 To determine the nucleus DNA content of accessions, flow cytometry was carried out  
101 using the method described by Arumuganathan and Earle (1991). Because seeds used in this  
102 study resulted from open pollination, we evaluated three genotypes for each accession to obtain a  
103 more accurate ploidy representation of the population. When the three selected genotypes were  
104 not at the same ploidy level, a fourth genotype was evaluated. The ploidy level of the accession  
105 was determined by the ploidy of the majority genotypes (75%).

106 Fresh mature *F. ovina* leaf samples in the nursery field were harvested between 9-11 a.m.  
107 and trimmed to 1-2 cm and used for flow cytometry. Perennial ryegrass leaf tissue was harvested  
108 at the same time in the greenhouse. For each sample the flow cytometry staining solution  
109 contained 4.29  $\mu$ L propidium iodide, 0.71 mL of CyStain UV Precise P staining buffer, and 2.14  
110  $\mu$ L RNaseA. To prepare plant tissue, a 0.5 cm x 0.5 cm leaf samples was excised into small  
111 pieces using a razor blade in 500  $\mu$ L CyStain UV Precise P extraction buffer (Sysmex) and  
112 passed through a 50- $\mu$ m size filter (Sysmex). The staining solution was added to the flow-  
113 through to stain the nuclei in each sample. Samples were stored on ice before loading the flow  
114 cytometer. Flow cytometry was carried out using the BD LSRII H4760 (LSRII) instrument (BD  
115 Biosciences, USA) with PI laser detector using 480V with a minimum of 1,000 events at the  
116 University of Minnesota Flow Cytometry Resource (UCRF). Data were visualized and analyzed  
117 on BD FACSDiva 8.0.1 software.

#### 118 **DNA Content Estimation and Ploidy Level Determination**

119 Species DNA content was estimated following the method described by Dolezel and  
120 Bartoš (2005). The perennial ryegrass (*Lolium perenne*) 2C DNA content (2C = 5.66 pg/2C)  
121 served as the diploid DNA content standard (Arumuganathan, Tallury, Fraser, Bruneau, & Qu,  
122 1999). Sample 2C DNA content was calculated using **Equation 1**. To estimate the ploidy level  
123 in *F. ovina* complex, diploid *F. ovina* PI 230246 measured in previous study was used (2C = 4.7  
124 pg/2C); species ploidy level was estimated using **Equation 2**.

**Equation 1**      Sample 2C DNA content =  $\frac{(\text{sample G1 peak mean})}{(\text{standard G1 peak mean})} \times \text{standard 2C DNA content (pg DNA)}$

**Equation 2**      Sample ploidy =  $\frac{2n \times \text{sample pg/nucleus}}{\text{PI 230246 pg/nucleus}}$

125

126 **Seed Size Measurement and Comparison**

127            For seed size measurements, we randomly picked 10 seeds from each of three accessions  
128 for each calculated ploidy level (a total of 12 accessions). Tetraploid *F. Ovina* cv. Quatro and  
129 hexaploid *F. brevipila* cv. Beacon were also included as references.

130            Seeds were spread on a digital scanner (Epson perfection v6 flatbed scanner, Nagano,  
131 Japan) and scanned at 1200 dots per inch (dpi) with the size of 2097 x 1624 pixels. The images  
132 were processed with a custom Matlab script ([https://github.umn.edu/jbarreto/seed\\_morphology](https://github.umn.edu/jbarreto/seed_morphology))  
133 that transformed the original images to measure the seed length and width respectively as the  
134 length (in pixels) of the major and minor axes of a fitted ellipse, whereas the area was calculated  
135 as the number of pixels in the seed. The seed area was calculated for each of 10 seeds for each of  
136 the 14 entries. The seed area was used to analyze the correlation between ploidy level and seed  
137 size and visualized using the ggplot2 package in R (Kahle & Wickham, 2013).

138



139 **RESULTS**

140 **DNA Content Measurement and Ploidy Estimation**

141 *Festuca ovina* accessions had a high level of DNA content variation with the smallest  
142 DNA content of 3.77 pg (2C) from PI 115358, and the largest genome 19.66 pg (2C) from PI  
143 302899 (**Table S2**). Flow cytometry revealed the 127 accessions represented a range of ploidy  
144 levels from diploid to octoploid (**Figure 1**).

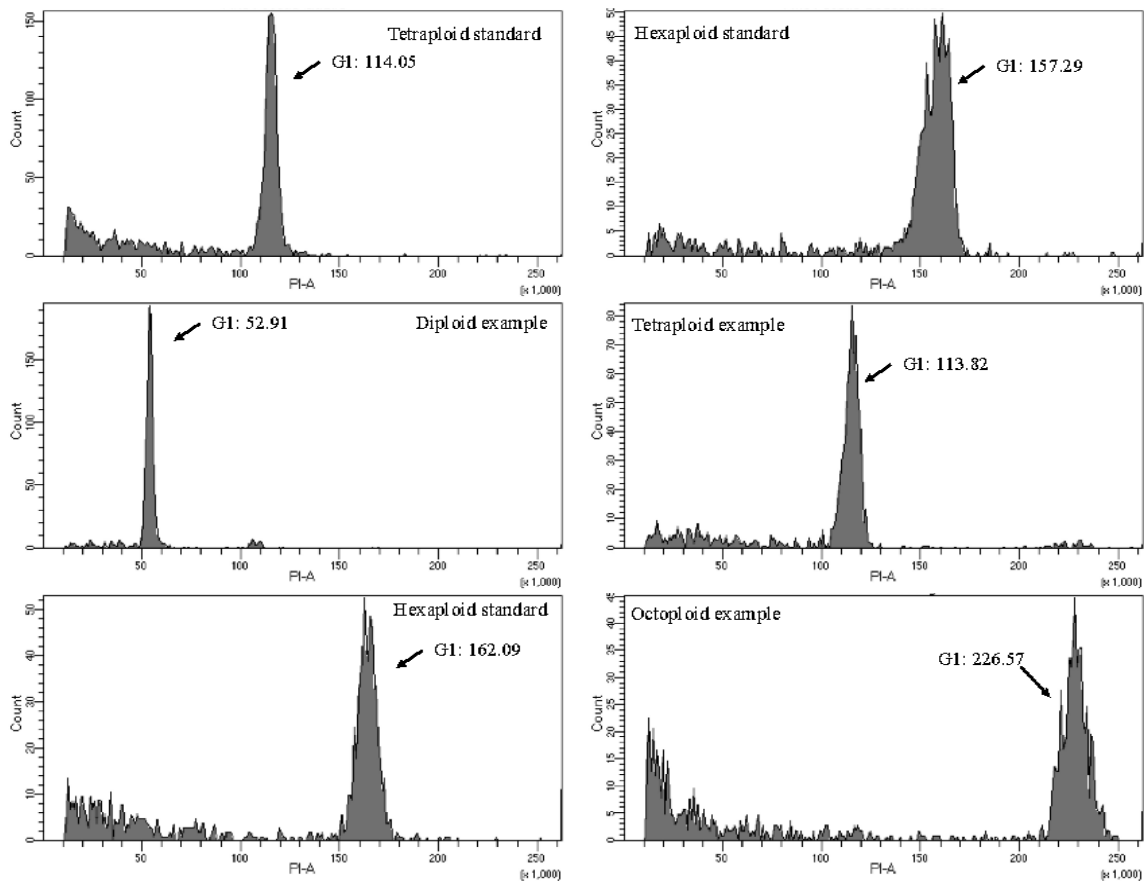

145

146 **Figure 1.** Flow cytometry data example of the PI accessions. Tetraploid sheep fescue cultivar  
147 ‘Quatro’ and hexaploid hard fescue cultivar ‘Beacon’ were included as standards. PI accessions  
148 included taxa that cover at least four ploidy levels.

149 The largest standard deviation within accession was 1.25 pg (PI 274619) while the lowest  
150 was 0.01 pg (W6 23622). The average of standard deviation of the 126 accessions was 0.45 pg.  
151 The majority of accessions had consistent DNA content (judged by standard deviation) within  
152 the three genotypes examined. There were cases in which the sampled genotypes had more than  
153 one ploidy level. For example, for PI 330706, there were two tetraploids and one triploid plant;  
154 however, the fourth sample suggested the accession was tetraploid (**Figure 2**). Three out of the  
155 five genotypes examined in PI 235072 accession had three different ploidies (data not shown)  
156 and were therefore excluded from further analysis. The DNA content estimation of the 126  
157 accessions is summarized in **Figure 3**.

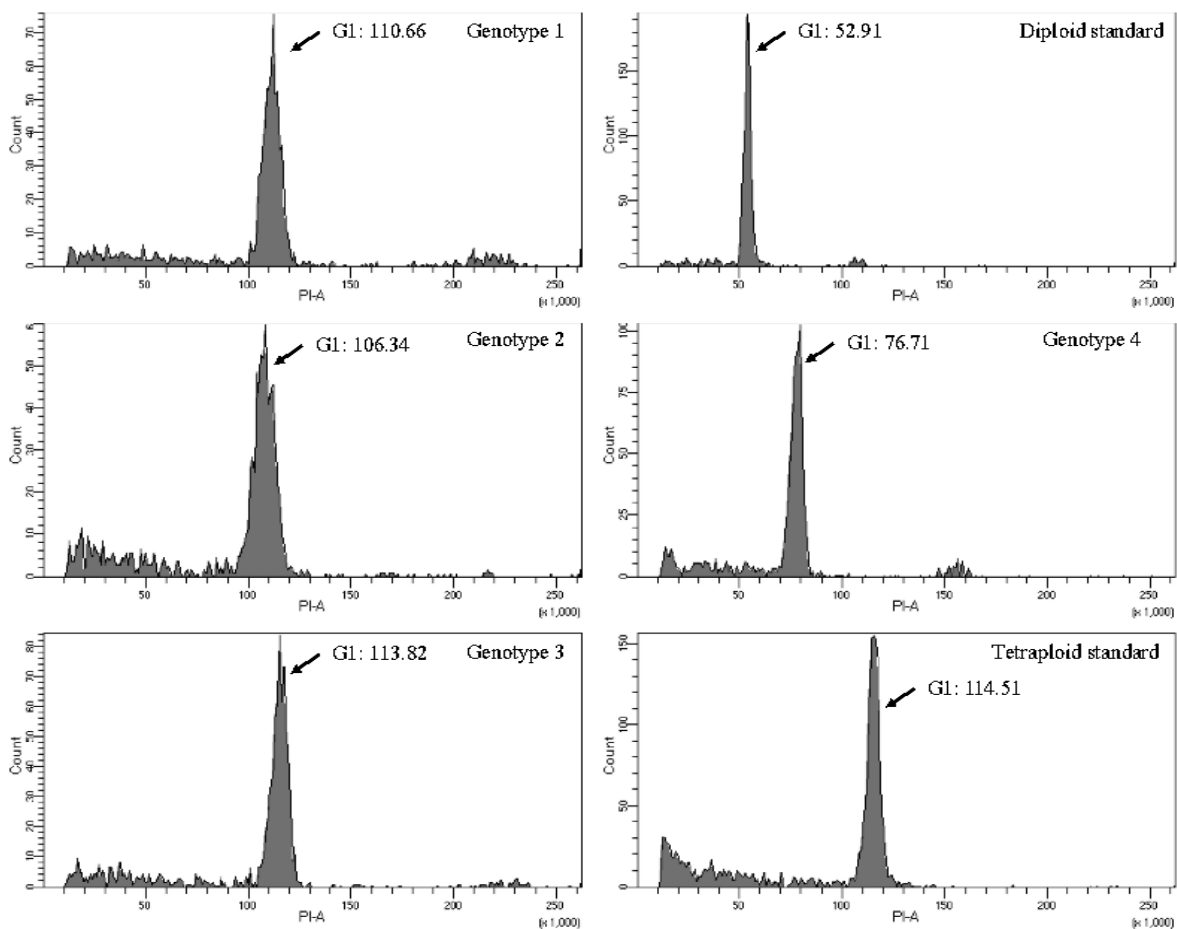

158

159 **Figure 2.** Flow cytometry histogram of PI 330706. Three genotypes from this accession had  
160 similar DNA content compared to the tetraploid standard cultivar ‘Quatro’. One genotype from  
161 this accession had a DNA content between diploid and tetraploid standard and was estimated to  
162 be triploid based on the DNA content estimation.

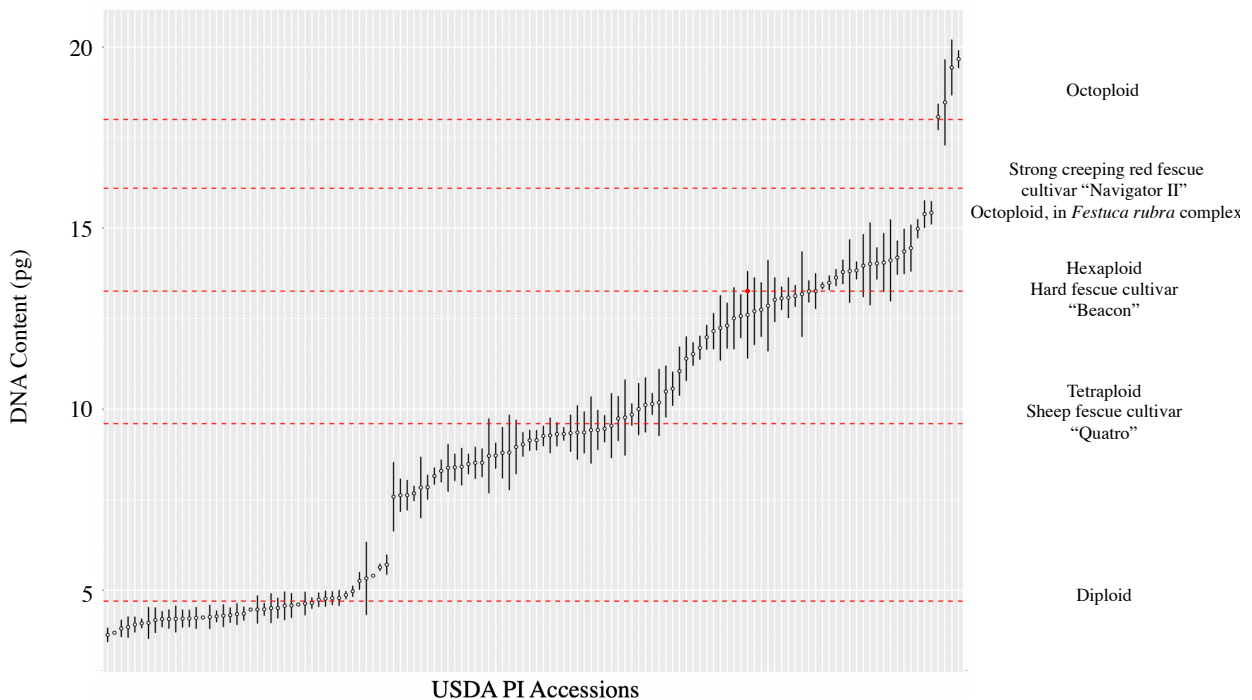

163  
164 **Figure 3.** Accessions sorted by the estimated DNA content. Dashed red lines represent the  
165 ploidy level estimation for cultivars listed to the right of the figure.

### 166 **Ploidy Estimation**

167 To estimate ploidy, estimated DNA content was divided by the DNA content of the  
168 known diploid and round up to an integer. Ploidy estimates for the 126 accessions are  
169 summarized in **Table 1**. The majority of the accessions (82%) were di-, tetra-, hexa-, and  
170 octoploids while 18% of accessions were potential tri-, penta-, and septaploids. The seven  
171 accessions estimated as triploid had the estimated ploidy level between 3.23-3.47; the 14

172 pentaploid accessions had estimated ploidy between 4.70-5.47; and the 2 septaploids had  
173 estimated ploidy level of 6.55 and 6.56. Ploidy distribution by country of origin is shown in  
174 **Figure 4**.

175 **Table 1.** The ploidy level estimation of the 126 USDA PI accessions.

| Ploidy level           | Diploid     | Tetraploid   | Hexaploid    | Octoploid     | Other Ploidy |
|------------------------|-------------|--------------|--------------|---------------|--------------|
| Accession Count        | 42          | 34           | 22           | 4             | 24           |
| DNA content range (pg) | 3.76 ~ 5.71 | 8.29 ~ 10.48 | 13.02~ 14.98 | 18.07 ~ 19.66 | NA           |

176

177

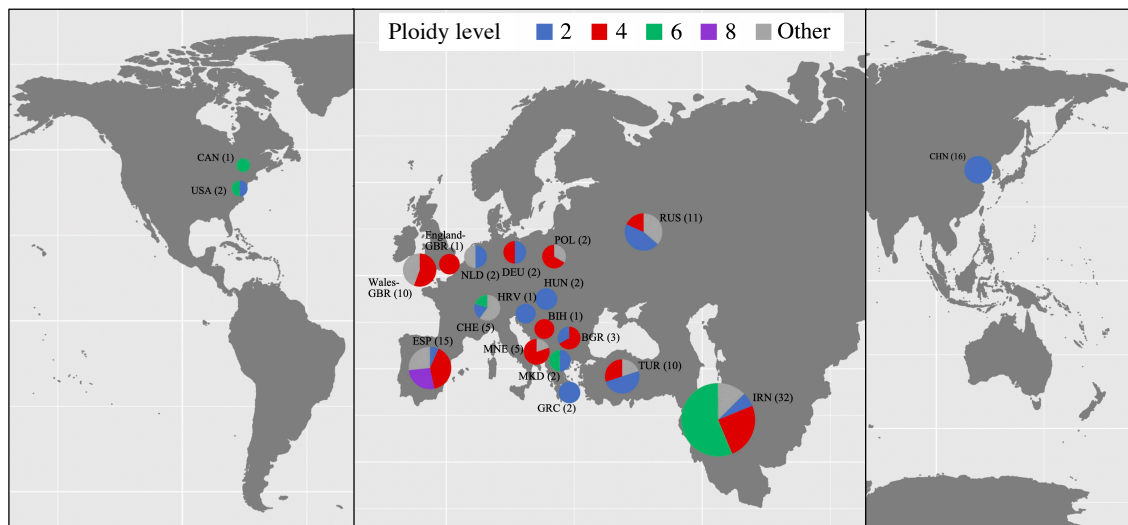

178

179 **Figure 4.** Ploidy estimation by DNA content for the 126 USDA PI accessions.

180 Besides DNA content variation, we observed leaf color variation at different ploidy  
181 levels. For all ploidy levels, there were the presence of blue-greenish color and green color

182 **(Figure 5).**

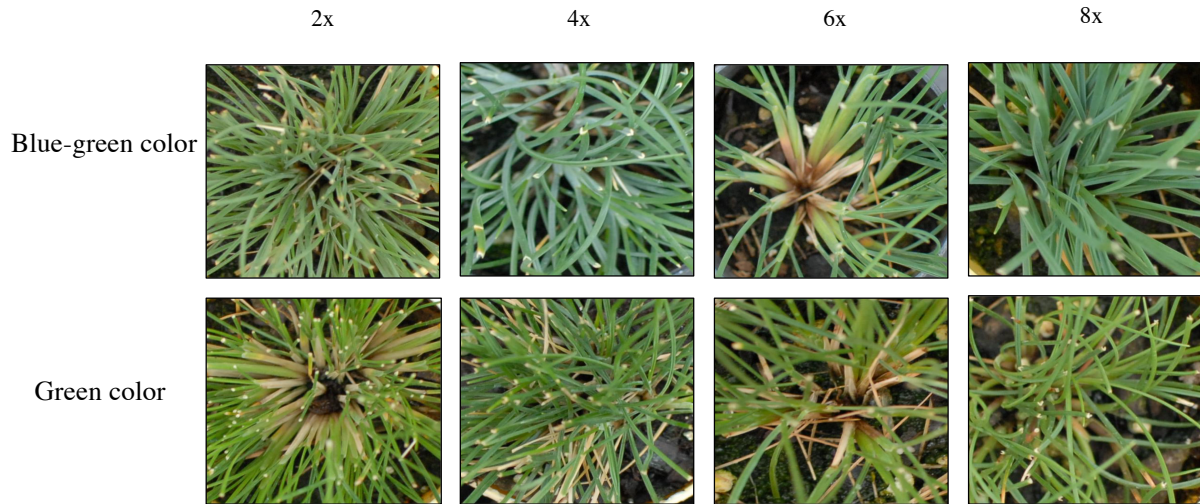

183

184 **Figure 5.** Leaf color differences observed in the *F. ovina* collection. We observed both green and  
185 blue-greenish leaf color for plants at all four ploidy levels.

### 186 **Seed Size and Ploidy**

187 We found statistical differences in seed size among ploidy levels. In general, higher  
188 ploidy level was associated with larger seed size. Diploid accessions had the average seed size  
189 between 1.5 and 2.5 mm<sup>2</sup>, tetraploid accessions seed size varies between 2 and 4 mm<sup>2</sup>, and  
190 hexaploid and octoploid had similar seed size between 4-6.5 mm<sup>2</sup> (**Figure 6**).

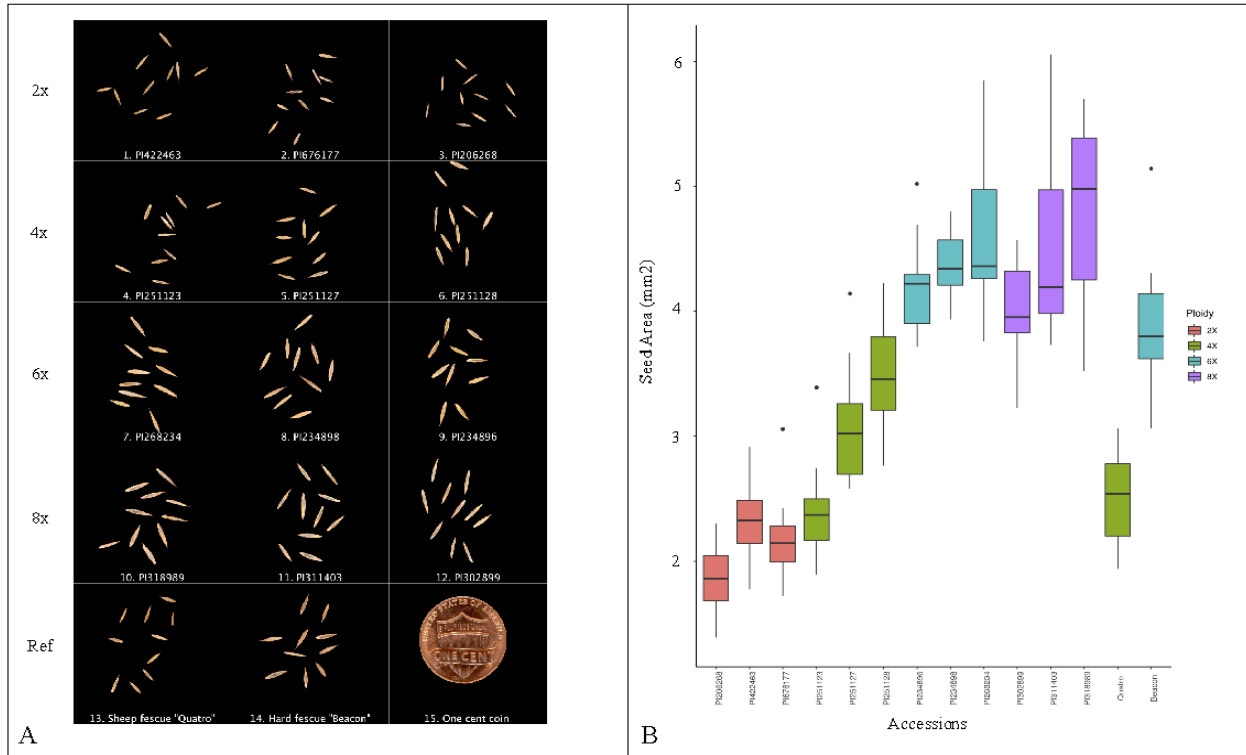

191

192

193

194

195

196

197

198

199

200

**Figure 6.** Comparison of seed area and ploidy level. The seed morphology of the examined 12 accessions and two fine fescues cultivars were shown in (A) with the ploidy of each accession labeled on the left. Box plot of seed size comparison is shown in (B); larger seed size was associated with higher ploidy level.

Analysis of the main effects model suggested that the ploidy level explains over 70% of the variation in seed area and length, and more than 55% of the variation in seed length. We rejected the hypothesis that ploidy level has no significant effect on the seed size of fine fescues (*p*-value: < 2.2e-16) (Table S3, S4).

## 201     **DISCUSSION**

202             Accessions from the USDA NPGS can serve a valuable role as a source of genetic  
203     diversity for crop improvement providing an important gene pool for the improvement of both  
204     abiotic and biotic stress tolerance (Rubenstein, Smale, & Widrechner, 2006). Numerous studies  
205     have been done to characterize PI germplasm with topics varying from soybean maturity groups  
206     (Nelson et al., 1987) to the identification of allelopathic accessions in rice (Dilday et al., 1994).  
207     These accessions have also been used to selected for reproductive characteristics and seed  
208     production in garlic (Jenderek & Hannan, 2004), screening for disease resistance in dry beans  
209     (Pastor-Corrales, 2003), and the evaluation of drought tolerance in watermelon at seedling stages  
210     (Zhang et al., 2011). In forage crops and turfgrasses, tall wheatgrass was evaluated for forage  
211     yield and quality (Vogel & Moore, 1998) and Kentucky bluegrass was studied for the  
212     reproductive mode (Wieners, Fei, & Johnson, 2006). It is clear that USDA PI accessions provide  
213     a diverse gene pool for cultivar abiotic and biotic stress tolerance improvement (Rubenstein et  
214     al., 2006). The USDA accessions are particularly important for turfgrass breeding and genetics  
215     because commercial turfgrass cultivars have undergone heavy selection and lost genetic  
216     diversity.

217             Different from major crops, most turfgrass species have numerous ploidy levels and some  
218     are morphologically indistinguishable; therefore, germplasm characterization is very important.  
219     Ploidy determination of 200 perennial ryegrass (*Lolium perenne*) suggested that six accessions  
220     were tetraploid and 194 were diploid (Wang, Bigelow, & Jiang, 2009). Screening of buffelgrass  
221     (*Cenchrus ciliaris* L. syn. *Pennisetum ciliare* (L.) Link) germplasm suggested multiple ploidy  
222     levels existed in the PI collection (Burson, Actkinson, Hussey, & Jessup, 2012). A similar result

223 was found in buffalograss, where multiple ploidy levels were found in the PI collections  
224 (Johnson et al., 1998).

225 The *F. ovina* complex includes seven species and three additional subspecies that are  
226 highly outcrossing and visually indistinguishable (Stace, 2010; Watson, 1958; Wilkinson &  
227 Stace, 1991). The 126 *F. ovina* USDA PI accessions used in our study have ploidy levels ranging  
228 from diploid to octoploid. The DNA content predicted by flow cytometry showed low average  
229 standard deviation, suggesting the methods for DNA content measurement is consistent. We  
230 measured DNA content variation between genotypes at same ploidy level, suggesting complex  
231 genome composition variation, which could be explained by post-polyploid diploidization events  
232 with differential gene loss (Mandáková & Lysak, 2018). This variation could also be the result of  
233 the change of transposon elements (Kidwell, 2002), and hybridization in the field (Leitch &  
234 Leitch, 2008; Soltis, Marchant, Van de Peer, & Soltis, 2015) or different chromosome size in  
235 different populations (Ceccarelli, Falistocco, & Cionini, 1992).

236 Although the DNA content of diploid samples was clearly separated from higher ploidies,  
237 there is no clear separation between accessions with higher ploidy levels. We also noticed ploidy  
238 level variation within some accessions. For example, of the four genotypes within the accession  
239 PI 330706 examined in this study, three were tetraploid while one was triploid. The triploid plant  
240 is likely the result of hybridization between the tetraploid plant with the pollen from some  
241 diploid relative. Another example is PI 235072, where we found three ploidy levels represented  
242 in the five genotypes we examined. It is known that *F. ovina* species can easily hybridize with  
243 relatives even at different ploidy levels (Jenkin & Jenkin, 1955). Under open pollination  
244 conditions, it is not surprising that the seed purity is low. Our results suggest that resources



245 should be allocated such that the relevant USDA NPGS center managing open-pollinated species  
246 can properly isolate collections during seed increase.

247 While most accessions we surveyed can be assigned to discrete ploidy bins, 18%  
248 suggested DNA content that fell between ploidy levels. These accessions may have originated  
249 through hybridization between different diploid parents. It is also possible that these accessions  
250 are either aneuploid or dysploid, both of which have experienced chromosome gain/loss, or  
251 rearrangements. Further evaluation using a number of different approaches, ranging from  
252 morphological classification to genotyping, will be needed to fully classify these accessions.

253 In our study, all 16 accessions from China were found to be diploids and majority of  
254 plants from Iran were hexaploid. It is known that environmental and geographical factors played  
255 a role in *Festuca* ssp. genome size evolution (Ceccarelli et al., 1992; Šmarda, Bureš, Horová,  
256 Foggi, & Rossi, 2008). It would be interesting to see if the geographic location would be a factor  
257 to explain the distribution of ploidy levels. However, there is a lack of information on the  
258 specific area each wild accession was collected. Geographic information added to each accession  
259 in the NPGS collection would be useful; Rubenstein et al. (2006) found that NPGS users were  
260 more likely to utilize accessions when additional and accurate information was given about  
261 accessions. Beyond plant breeding, this new knowledge about the *F. ovina* collection might  
262 inspire other avenues of exploration such as investigating how geographic origin plays a role in  
263 taxon adaptation.

264 Seed size comparison suggests that accessions with higher ploidy levels tend to have a  
265 bigger seed size in *F. ovina* complex. Seed size often has an important impact on germination  
266 and plant development. Bretagnolle et al. (1995) found that larger seed size is correlated with

267 higher ploidy level in *Dactylis glomerata* L. and the larger seed size had a positive influence on  
268 robust seedling growth (Bretagnolle, Thompson, & Lumaret, 1995). Larger seeds contain more  
269 carbohydrates that provide the seedling vigor to help increase the competitive advantage in the  
270 natural environment (Te Beest et al., 2011). Besides observing DNA content variation, we also  
271 observed phenotypic variation on leaf color within the *F. ovina* collection. Green and bluish leaf  
272 color was observed in all ploidy levels, suggesting that leaf-color-based fine fescue identification  
273 is not reliable (Beard, 1972; Hubbard, 1968).

## 274 **CONCLUSION**

275 We evaluated 127 USDA PI accession and provided their DNA content and ploidy level  
276 estimation for 126 accessions. A total of 102 accessions were assigned to discrete ploidy levels,  
277 with the remaining had DNA content between discrete ploidy levels. Because of the cross-  
278 pollinating nature of *Festuca ovina* complex, better pollen control during the germplasm  
279 maintenance period could potentially reduce the chance of contaminations. Meanwhile,  
280 researchers should examine the PI collections to determine their ploidy level prior to adapting the  
281 accessions in their breeding program. This research builds the ground work for turfgrass  
282 researchers for using the *F. ovina* in their breeding program.

283

284 **CONFLICT OF INTEREST STATEMENT**

285 The authors declare there are no conflicts of interest.

286 **ACKNOWLEDGMENT**

287           The authors would like to thank Dr. Ya Yang at the University of Minnesota for  
288 discussion about polyploid genome evolution. The authors would also like to thank Drs. Adrian  
289 Hegeman and Cory Hirsch at the University of Minnesota for reviewing this manuscript and  
290 providing comments and feedback. This research is funded by the National Institute of Food and  
291 Agriculture, U.S. Department of Agriculture, Specialty Crop Research Initiative under award  
292 number 2017-51181-27222.

293

294

295 **SUPPLEMENTAL MATERIAL**

296 **Table S1.** USDA PI collections by the country of origins. Accessions used in this study covered  
 297 20 countries, with Iran having the most entries.

| <b>Location</b>        | <b>PI Number</b> |          |          |          |        |        |
|------------------------|------------------|----------|----------|----------|--------|--------|
| Bosnia and Herzegovina | 251128           |          |          |          |        |        |
| Bulgaria               | 634302           | 634303   | 636567   |          |        |        |
| Canada                 | 236832           |          |          |          |        |        |
| China                  | 499640           | 595130   | 595140   | 595145   | 595146 | 595158 |
|                        | 618975           | 595167   | 595170   | 595178   | 618972 | 634304 |
|                        | 655206           | W6 23550 | W6 23594 | W6 23622 |        |        |
| Croatia                | 251421           |          |          |          |        |        |
| England                | 595052           |          |          |          |        |        |
| Germany                | 237708           | 422463   |          |          |        |        |
| Greece                 | 206561           | 249739   |          |          |        |        |
| Hungary                | 257740           | 257741   |          |          |        |        |
| Iran                   | 227362           | 227506   | 227507   | 229453   | 229454 | 229533 |
|                        | 229456           | 229497   | 229502   | 229503   | 230247 |        |
|                        | 251384           | 251385   | 268234   | 330706   | 380845 | 380846 |
|                        | 380847           | 380848   | 380849   | 380850   | 380851 | 380852 |
|                        | 380853           | 380854   | 380855   | 380856   | 380857 | 384860 |
|                        | 384861           | 384863   | 547398   |          |        |        |
| Macedonia              | 250965           | 250967   |          |          |        |        |
| Montenegro             | 251123           | 251125   | 251126   | 251127   | 251131 |        |
| Netherlands            | 237179           | 315448   |          |          |        |        |
| Poland                 | 274619           | 283320   | 287541   |          |        |        |
| Russia                 | 115358           | 312453   | 314522   | 314523   | 314571 | 314687 |
|                        | 316249           | 371896   | 538933   | 538934   | 676177 |        |
| Spain                  | 234478           | 234750   | 234751   | 234752   | 234758 | 287822 |
|                        | 287823           | 289652   | 302898   | 302899   | 302900 | 311403 |
|                        | 311405           | 318989   | 318990   |          |        |        |
| Switzerland            | 234895           | 234896   | 234897   | 234898   | 235072 |        |
| Turkey                 | 109497           | 206268   | 340103   | 383650   | 383651 | 383652 |
|                        | 383653           | 383654   | 383655   | 568183   |        |        |
| United States          | 578733           | 537103   |          |          |        |        |
| Wales                  | 577098           | 577099   | 595049   | 595050   | 595051 | 595059 |

---

|         |        |        |        |        |
|---------|--------|--------|--------|--------|
|         | 595060 | 595061 | 595062 | 595063 |
| Unknown | 189146 |        |        |        |

---

298

299

300 **Table S2.** DNA content estimation and standard deviation of the USDA PI accessions. Data was  
 301 sorted by the DNA content from the smallest to the largest.

| PI number | Average DNA Content (pg) | DNA Content SD (pg) | Estimated ploidy level |
|-----------|--------------------------|---------------------|------------------------|
| 109497    | 4.57                     | 0.39                | 2                      |
| 115358    | 3.77                     | 0.19                | 2                      |
| 189146    | 4.61                     | 0.01                | 2                      |
| 206268    | 4.51                     | 0.40                | 2                      |
| 206561    | 4.31                     | 0.20                | 2                      |
| 227362    | 9.77                     | 1.04                | 4                      |
| 227506    | 8.52                     | 0.39                | 4                      |
| 227507    | 8.49                     | 0.27                | 4                      |
| 229453    | 9.54                     | 0.89                | 4                      |
| 229454    | 8.39                     | 0.37                | 4                      |
| 229456    | 14.18                    | 0.46                | 6                      |
| 229497    | 8.72                     | 0.35                | 4                      |
| 229502    | 8.80                     | 1.03                | 4                      |
| 229503    | 14.45                    | 0.64                | 6                      |
| 229533    | 13.02                    | 0.61                | 6                      |
| 230247    | 13.26                    | 0.48                | 6                      |
| 234478    | 4.58                     | 0.33                | 2                      |
| 234750    | 18.07                    | 0.36                | 8                      |
| 234751    | 12.51                    | 0.85                | 5 (5.32)               |
| 234752    | 8.80                     | 0.70                | 4                      |
| 234758    | 9.74                     | 0.61                | 4                      |
| 234895    | 11.52                    | 0.31                | 5 (4.90)               |
| 234896    | 14.02                    | 0.44                | 6                      |
| 234897    | 4.20                     | 0.26                | 2                      |
| 234898    | 15.42                    | 0.31                | 7 (6.56)               |
| 236832    | 13.06                    | 0.31                | 6                      |
| 237179    | 4.22                     | 0.24                | 2                      |
| 237708    | 9.14                     | 0.28                | 4                      |
| 249739    | 4.78                     | 0.18                | 2                      |
| 250965    | 3.94                     | 0.23                | 2                      |
| 250967    | 13.41                    | 0.09                | 6                      |
| 251123    | 9.32                     | 0.18                | 4                      |
| 251125    | 10.18                    | 0.92                | 4                      |
| 251126    | 12.15                    | 0.49                | 5 (5.17)               |
| 251127    | 10.00                    | 0.71                | 4                      |
| 251128    | 9.14                     | 0.27                | 4                      |

|        |       |      |          |
|--------|-------|------|----------|
| 251131 | 10.12 | 0.75 | 4        |
| 251384 | 4.97  | 0.15 | 2        |
| 251385 | 13.96 | 0.86 | 6        |
| 251421 | 4.74  | 0.19 | 2        |
| 257740 | 4.20  | 0.21 | 2        |
| 257741 | 4.64  | 0.15 | 2        |
| 268234 | 14.01 | 1.13 | 6        |
| 274619 | 12.86 | 1.25 | 5 (5.47) |
| 283320 | 10.14 | 0.29 | 4        |
| 287541 | 10.56 | 0.46 | 4        |
| 287822 | 9.42  | 0.92 | 4        |
| 287823 | 9.36  | 0.57 | 4        |
| 289652 | 7.67  | 0.20 | 3 (3.27) |
| 302898 | 9.31  | 0.32 | 4        |
| 302899 | 19.66 | 0.24 | 8        |
| 302900 | 9.03  | 0.33 | 4        |
| 311403 | 18.47 | 1.18 | 8        |
| 311405 | 12.61 | 1.20 | 5 (5.36) |
| 312453 | 10.49 | 0.71 | 4        |
| 314522 | 12.75 | 0.74 | 5 (5.43) |
| 314523 | 12.71 | 0.92 | 5 (5.41) |
| 314571 | 4.28  | 0.15 | 2        |
| 314687 | 4.26  | 0.32 | 2        |
| 315448 | 11.98 | 0.33 | 5 (5.10) |
| 316249 | 8.96  | 0.74 | 4        |
| 318989 | 19.43 | 0.76 | 8        |
| 318990 | 11.05 | 0.67 | 5 (4.70) |
| 330706 | 9.43  | 0.54 | 4        |
| 340103 | 9.26  | 0.27 | 4        |
| 371896 | 12.57 | 0.60 | 5 (5.35) |
| 380845 | 13.63 | 0.23 | 6        |
| 380846 | 13.25 | 0.30 | 6        |
| 380847 | 12.24 | 0.89 | 5 (5.21) |
| 380848 | 13.13 | 0.29 | 6        |
| 380849 | 15.39 | 0.37 | 7 (6.55) |
| 380850 | 12.31 | 0.62 | 5 (5.24) |
| 380851 | 13.79 | 0.33 | 6        |
| 380852 | 14.05 | 0.80 | 6        |
| 380853 | 14.35 | 0.62 | 6        |

|        |       |      |          |
|--------|-------|------|----------|
| 380854 | 13.81 | 0.86 | 6        |
| 380855 | 14.11 | 1.12 | 6        |
| 380856 | 4.77  | 0.21 | 2        |
| 380857 | 13.83 | 0.24 | 6        |
| 383650 | 9.46  | 0.36 | 4        |
| 383651 | 4.87  | 0.10 | 2        |
| 383652 | 4.47  | 0.38 | 2        |
| 383653 | 8.15  | 0.23 | 3 (3.47) |
| 383654 | 8.38  | 0.65 | 4        |
| 383655 | 7.85  | 0.33 | 3 (3.34) |
| 384860 | 11.40 | 0.60 | 5 (4.85) |
| 384861 | 13.08 | 0.55 | 6        |
| 384863 | 14.98 | 0.25 | 6        |
| 422463 | 4.21  | 0.36 | 2        |
| 499640 | 4.35  | 0.18 | 2        |
| 537103 | 13.17 | 1.17 | 6        |
| 538933 | 11.69 | 0.32 | 5 (4.98) |
| 538934 | 4.17  | 0.34 | 2        |
| 547398 | 13.49 | 0.19 | 6        |
| 568183 | 4.22  | 0.23 | 2        |
| 577098 | 7.62  | 0.45 | 3 (3.24) |
| 577099 | 7.84  | 0.84 | 3 (3.33) |
| 578733 | 4.79  | 0.21 | 2        |
| 595049 | 7.62  | 0.41 | 3 (3.24) |
| 595050 | 9.27  | 0.48 | 4        |
| 595051 | 9.85  | 0.30 | 4        |
| 595052 | 9.34  | 0.50 | 4        |
| 595059 | 7.58  | 0.95 | 3 (3.23) |
| 595060 | 8.41  | 0.51 | 4        |
| 595061 | 9.36  | 0.74 | 4        |
| 595062 | 8.71  | 1.02 | 4        |
| 595063 | 8.52  | 0.43 | 4        |
| 595130 | 4.10  | 0.43 | 2        |
| 595140 | 4.30  | 0.30 | 2        |
| 595145 | 4.05  | 0.21 | 2        |
| 595146 | 3.82  | 0.04 | 2        |
| 595158 | 4.23  | 0.29 | 2        |
| 595167 | 4.25  | 0.04 | 2        |
| 595170 | 4.47  | 0.03 | 2        |



|          |      |      |   |
|----------|------|------|---|
| 595178   | 4.34 | 0.29 | 2 |
| 618972   | 5.26 | 0.24 | 2 |
| 618975   | 4.08 | 0.12 | 2 |
| 634302   | 8.29 | 0.30 | 4 |
| 634303   | 4.47 | 0.17 | 2 |
| 634304   | 4.51 | 0.27 | 2 |
| 636567   | 3.98 | 0.28 | 2 |
| 655206   | 5.33 | 1.00 | 2 |
| 676177   | 4.63 | 0.32 | 2 |
| W6 23550 | 5.71 | 0.27 | 2 |
| W6 23594 | 5.63 | 0.09 | 2 |
| W6 23622 | 5.40 | 0.01 | 2 |

302

303

304 **Table S3.** The linear regression to associate seed size with ploidy levels. *t* statistics suggested  
305 there was a significant difference in seed size between different ploidy levels.

| <b>Estimate</b>    | <b>Std.</b> | <b>Error</b> | <b><i>t</i> value</b> | <b>Pr (&gt; <i>t</i> )</b> |
|--------------------|-------------|--------------|-----------------------|----------------------------|
| <b>(Intercept)</b> | 2.1199      | 0.1079       | 19.644                | < 2.00E-16 ***             |
| <b>Ploidy 4X</b>   | 0.7584      | 0.1428       | 5.312                 | 4.31E-07 ***               |
| <b>Ploidy 6X</b>   | 2.1432      | 0.1428       | 15.013                | < 2.00E-16 ***             |
| <b>Ploidy 8X</b>   | 2.3051      | 0.1526       | 15.104                | < 2.00E-16 ***             |

306 Signif. codes: 0 '\*\*\*', 0.001 '\*\*', 0.01 '\*', 0.05 '.', 0.1 '.', 1

307 **Table S4.** The ANOVA analysis of PI accessions using ploidy levels as the variable. Significant  
308 differences were found between seed size and the corresponding ploidy level.

| <b>Df</b>        | <b>Sum</b> | <b>Sq</b> | <b>Mean</b> | <b>Sq</b> | <b>F- value</b> | <b>Pr(&gt;F)</b> |
|------------------|------------|-----------|-------------|-----------|-----------------|------------------|
| <b>Ploidy</b>    | 3          | 121.102   | 40.367      | 1.16E+02  | < 2.20E-16      | ***              |
| <b>Residuals</b> | 136        | 47.514    | 0.349       |           |                 |                  |

309 Signif. codes: 0 '\*\*\*', 0.001 '\*\*', 0.01 '\*', 0.05 '.', 0.1 '.', 1

## 310 **AUTHOR CONTRIBUTIONS**

311 YQ and SH performed the flow cytometry experiments, analyzed the data. JO performed  
312 the image analysis. YQ wrote the manuscript. EW secured funding for this project, supervised  
313 this research, provided suggestions, and comments. All authors contributed to the revision of the  
314 manuscript and approved the final version.

315

316 **REFERENCES**

- 317 Arumuganathan, K., & Earle, E. (1991). Nuclear DNA content of some important plant species.  
318 *Plant molecular biology reporter*, 9(3), 208-218.
- 319 Arumuganathan, K., Tallury, S., Fraser, M., Bruneau, A., & Qu, R. (1999). Nuclear DNA  
320 content of thirteen turfgrass species by flow cytometry. *Crop Science*, 39(5), 1518-1521.
- 321 Baird, J. H., Kopecký, D., Lukaszewski, A. J., Green, R. L., Bartoš, J., & Doležel, J. (2012).  
322 Genetic diversity of turf-type tall fescue using diversity arrays technology. *Crop Science*,  
323 52(1), 408-412.
- 324 Barkworth, M., Capels, K., Long, S., Anderton, L., & Piep, M. (2007). Magnoliophyta  
325 Commelinidae (in part: Poaceae, part 1). Flora of North America North of Mexico. Vol.  
326 24. In: Oxford University Press: New York.
- 327 Beard, J. B. (1972). Turfgrass: Science and culture.
- 328 Bonos, S. A., Clarke, B. B., & Meyer, W. A. (2006). Breeding for disease resistance in the major  
329 cool-season turfgrasses. *Annu. Rev. Phytopathol.*, 44, 213-234.
- 330 Bonos, S. A., & Huff, D. R. (2013). Cool-season grasses: Biology and breeding. *Turfgrass:*  
331 *Biology, use, and management* (turfgrassbiolog), 591-660.
- 332 Bretagnolle, F., Thompson, J., & Lumaret, R. (1995). The influence of seed size variation on  
333 seed germination and seedling vigour in diploid and tetraploid *Dactylis glomerata* L.  
334 *Annals of botany*, 76(6), 607-615.
- 335 Budak, H., Shearman, R., Gaussoin, R. E., & Dweikat, I. (2004). Application of sequence-related  
336 amplified polymorphism markers for characterization of turfgrass species. *HortScience*,  
337 39(5), 955-958.
- 338 Burson, B., Actkinson, J., Hussey, M., & Jessup, R. (2012). Ploidy determination of buffel grass  
339 accessions in the USDA National Plant Germplasm System collection by flow cytometry.  
340 *South African Journal of Botany*, 79, 91-95.
- 341 Casler, M. D. (2003). *Turfgrass biology, genetics, and breeding*: John Wiley & Sons.
- 342 Ceccarelli, M., Falistocco, E., & Cionini, P. (1992). Variation of genome size and organization  
343 within hexaploid *Festuca arundinacea*. *Theoretical and Applied Genetics*, 83(3), 273-278.
- 344 Chang, H.-X., & Hartman, G. L. (2017). Characterization of insect resistance loci in the USDA  
345 soybean germplasm collection using genome-wide association studies. *Frontiers in plant*  
346 *science*, 8, 670.
- 347 Chen, Z., Wang, M. L., Waltz, C., & Raymer, P. (2009). Genetic diversity of warm-season  
348 turfgrass: seashore paspalum, bermudagrass, and zoysiagrass revealed by AFLPs.  
349 *Floriculture Ornamental Biotechnol*, 3(1), 20-24.
- 350 Christensen, S., Pratt, D. B., Pratt, C., Nelson, P., Stevens, M., Jellen, E. N., . . . Maughan, P. J.  
351 (2007). Assessment of genetic diversity in the USDA and CIP-FAO international nursery  
352 collections of quinoa (*Chenopodium quinoa* Willd.) using microsatellite markers. *Plant*  
353 *Genetic Resources*, 5(2), 82-95.
- 354 Christiansen, M., Andersen, S. B., & Ortiz, R. (2002). Diversity changes in an intensively bred  
355 wheat germplasm during the 20 th century. *Molecular Breeding*, 9(1), 1-11.
- 356 Clarke, B. B., White Jr, J. F., Hurley, R. H., Torres, M. S., Sun, S., & Huff, D. R. (2006).  
357 Endophyte-mediated suppression of dollar spot disease in fine fescues. *Plant disease*,  
358 90(8), 994-998.
- 359 Dilday, R., Lin, J., & Yan, W. (1994). Identification of allelopathy in the USDA-ARS rice  
360 germplasm collection. *Australian Journal of Experimental Agriculture*, 34(7), 907-910.

- 361 Doležel, J., & Bartoš, J. (2005). Plant DNA flow cytometry and estimation of nuclear genome  
362 size. *Annals of botany*, 95(1), 99-110.
- 363 Goldman, J. J. (2015). DNA contents in Texas bluegrass (*Poa arachnifera*) selected in Texas and  
364 Oklahoma determined by flow cytometry. *Genetic Resources and Crop Evolution*, 62(5),  
365 643-647.
- 366 Goodman, M. M. (1999). Broadening the genetic diversity in maize breeding by use of exotic  
367 germplasm. *The genetics and exploitation of heterosis in crops*(thegeneticsande), 139-  
368 148.
- 369 Hubbard, C. E. (1968). Grasses. A guide to their structure, identification, uses, and distribution in  
370 the British Isles. *Grasses. A guide to their structure, identification, uses, and distribution*  
371 *in the British Isles*.
- 372 Huff, D. R., & Palazzo, A. J. (1998). Fine fescue species determination by laser flow cytometry.  
373 *Crop Science*, 38(2), 445-450.
- 374 Jenderek, M. M., & Hannan, R. M. (2004). Variation in reproductive characteristics and seed  
375 production in the USDA garlic germplasm collection. *HortScience*, 39(3), 485-488.
- 376 Jenkin, T., & Jenkin, T. (1955). Interspecific and intergeneric hybrids in herbage grasses-XIV.  
377 The breeding affinities of *Festuca Ovina*. *Journal of Genetics*, 53(01).
- 378 Johnson, P. G., Kenworthy, K. E., Auld, D. L., & Riordan, T. P. (2001). Distribution of  
379 buffalograss polyploid variation in the southern Great Plains. *Crop science*, 41(3), 909-  
380 913.
- 381 Johnson, P. G., Riordan, T., & Arumuganathan, K. (1998). Ploidy level determinations in  
382 buffalograss clones and populations. *Crop science*, 38(2), 478-482.
- 383 Kahle, D., & Wickham, H. (2013). ggmap: Spatial Visualization with ggplot2. *The R journal*,  
384 5(1), 144-161.
- 385 Kidwell, M. G. (2002). Transposable elements and the evolution of genome size in eukaryotes.  
386 *Genetica*, 115(1), 49-63.
- 387 Leitch, A., & Leitch, I. (2008). Genomic plasticity and the diversity of polyploid plants. *Science*,  
388 320(5875), 481-483.
- 389 Leng, Y., Wang, R., Ali, S., Zhao, M., & Zhong, S. (2016). Sources and genetics of spot blotch  
390 resistance to a new pathotype of *Cochliobolus sativus* in the USDA National small grains  
391 collection. *Plant disease*, 100(10), 1988-1993.
- 392 Maluszynska, J. (2003). Cytogenetic tests for ploidy level analyses—chromosome counting. In  
393 *Doubled haploid production in crop plants* (pp. 391-395): Springer.
- 394 Mandáková, T., & Lysak, M. A. (2018). Post-polyploid diploidization and diversification  
395 through dysploid changes. *Current opinion in plant biology*, 42, 55-65.
- 396 Melchinger, A. (1999). Genetic diversity and heterosis. In (Vol. 10): chapter.
- 397 Mikel, M. A., Diers, B. W., Nelson, R. L., & Smith, H. H. (2010). Genetic diversity and  
398 agronomic improvement of North American soybean germplasm. *Crop science*, 50(4),  
399 1219-1229.
- 400 Nelson, R. L., Amdor, P. J., Orf, J. H., & Cavins, J. F. (1988). Evaluation of the USDA soybean  
401 germplasm collection: maturity groups 000 to IV (PL 427.136 to PI 445.845). *Technical*  
402 *bulletin-United States Department of Agriculture*, (1726).
- 403 Pastor-Corrales, M. (2003). Sources, genes for resistance and pedigrees of 52 rust and mosaic  
404 resistant dry bean germplasm lines released by the USDA Beltsville bean project in  
405 collaboration. *Science*, 29(3), 834-835.

- 406 Piper, C. V. (1906). *North American species of Festuca* (Vol. 10): US Government Printing  
407 Office.
- 408 Prasanna, B. (2012). Diversity in global maize germplasm: characterization and utilization.  
409 *Journal of biosciences*, 37(5), 843-855.
- 410 Qiu, Y., Hirsch, C. D., Yang, Y., & Watkins, E. (2019). Towards Improved Molecular  
411 Identification Tools in Fine Fescue (*Festuca* L., Poaceae) Turfgrasses: Nuclear Genome  
412 Size, Ploidy, and Chloroplast Genome Sequencing. *Frontiers in Genetics*, 10(1223).  
413 doi:10.3389/fgene.2019.01223
- 414 Reif, J. C., Zhang, P., Dreisigacker, S., Warburton, M. L., van Ginkel, M., Hoisington, D., . . .  
415 Melchinger, A. E. (2005). Wheat genetic diversity trends during domestication and  
416 breeding. *Theoretical and Applied Genetics*, 110(5), 859-864.
- 417 Rubenstein, K. D., Smale, M., & Widrlechner, M. P. (2006). Demand for genetic resources and  
418 the US National Plant Germplasm System. *Crop Science*, 46(3), 1021-1031.
- 419 Ruemmele, B., Brilman, L., & Huff, D. (1995). Fine fescue germplasm diversity and  
420 vulnerability. *Crop Science*, 35(2), 313-316.
- 421 Schmit, R., Duell, R., & Funk, C. (1974). *Isolation barriers and self-compatibility in selected*  
422 *fine fescues I*. Paper presented at the Proceedings of the Second International Turfgrass  
423 Research Conference.
- 424 Seal, A. (1983). DNA variation in *Festuca*. *Heredity*, 50(3), 225.
- 425 Šmarda, P., Bureš, P., Horová, L., Foggi, B., & Rossi, G. (2008). Genome size and GC content  
426 evolution of *Festuca*: ancestral expansion and subsequent reduction. *Annals of botany*,  
427 101(3), 421-433.
- 428 Soltis, P. S., Marchant, D. B., Van de Peer, Y., & Soltis, D. E. (2015). Polyploidy and genome  
429 evolution in plants. *Current opinion in genetics & development*, 35, 119-125.
- 430 Stace, C. (2010). *New flora of the British Isles*: Cambridge University Press.
- 431 Te Beest, M., Le Roux, J. J., Richardson, D. M., Brysting, A. K., Suda, J., Kubešová, M., &  
432 Pyšek, P. (2011). The more the better? The role of polyploidy in facilitating plant  
433 invasions. *Annals of botany*, 109(1), 19-45.
- 434 Van Esbroeck, G., & Bowman, D. T. (1998). Cotton germplasm diversity and its importance to  
435 cultivar development. *Journal of Cotton Science*.
- 436 Vargas, P., McAllister, H. A., Morton, C., Jury, S. L., & Wilkinson, M. J. (1999). Polyploid  
437 speciation in *Hedera* (Araliaceae): Phylogenetic and biogeographic insights based on  
438 chromosome counts and ITS sequences. *Plant Systematics and Evolution*, 219(3-4), 165-  
439 179.
- 440 Vasey, G. (1883). *Grasses of the United States*: US Government Printing Office.
- 441 Vogel, K. P., & Moore, K. J. (1998). Forage yield and quality of tall wheatgrass accessions in the  
442 USDA germplasm collection. *Crop science*, 38(2), 509-512.
- 443 Wang, Y., Bigelow, C. A., & Jiang, Y. (2009). Ploidy level and DNA content of perennial  
444 ryegrass germplasm as determined by flow cytometry. *HortScience*, 44(7), 2049-2052.
- 445 Watson, P. J. (1958). The distribution in Britain of diploid and tetraploid races within the *Festuca*  
446 *ovina* group. *The New Phytologist*, 57(1), 11-18.
- 447 Wieners, R. R., Fei, S.-z., & Johnson, R. C. (2006). Characterization of a USDA Kentucky  
448 bluegrass (*Poa pratensis* L.) core collection for reproductive mode and DNA content by  
449 flow cytometry. *Genetic Resources and Crop Evolution*, 53(8), 1531-1541.

- 450 Wilkinson, M. J., & Stace, C. A. (1991). A new taxonomic treatment of the *Festuca ovina* L.  
451 aggregate (Poaceae) in the British Isles. *Botanical Journal of the Linnean Society*, 106(4),  
452 347-397.
- 453 Zhang, H., Gong, G., Guo, S., Ren, Y., Xu, Y., & Ling, K.-S. (2011). Screening the USDA  
454 watermelon germplasm collection for drought tolerance at the seedling stage.  
455 *HortScience*, 46(9), 1245-1248.
- 456
